# Supplementary material for: The human liver microenvironment shapes the homing and function of CD4+ T-cell populations
Source: PubMed Central journal article supplement (PMC9185819; doi:10.1136/gutjnl-2020-323771), 2021-09-21

**Supplementary Figure 1 – Gating strategies used to identify and compare hepatic CD69<sup>+</sup>, CD69<sup>INT</sup> and CD69<sup>HI</sup> cells.**

**A**

**Centre A**

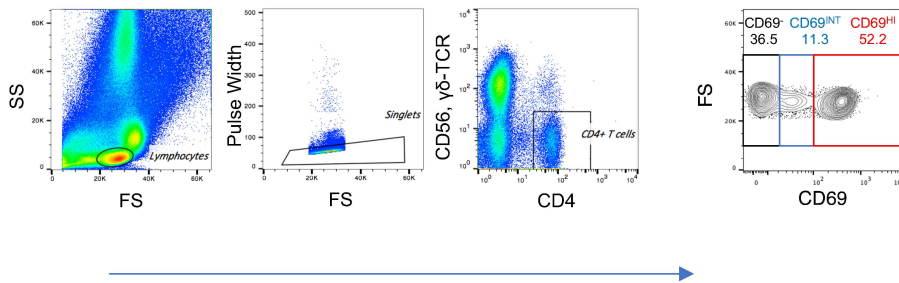

**B**

**Centre B**

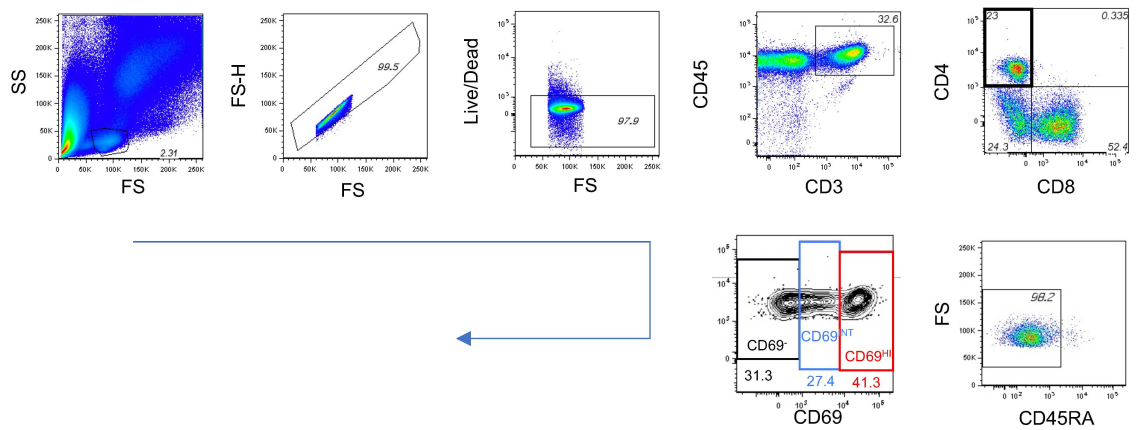

Supplement: gutjnl-2020-323771supp001.pdf [file gutjnl-2020-323771supp001.pdf]
