# Supplementary material for: The human liver microenvironment shapes the homing and function of CD4+ T-cell populations
Source: PubMed Central journal article supplement (PMC9185819; doi:10.1136/gutjnl-2020-323771), 2021-09-21

## Supplementary Figure 2 – Homing, location, and naïve/memory profiles of CD69-delineated subsets.

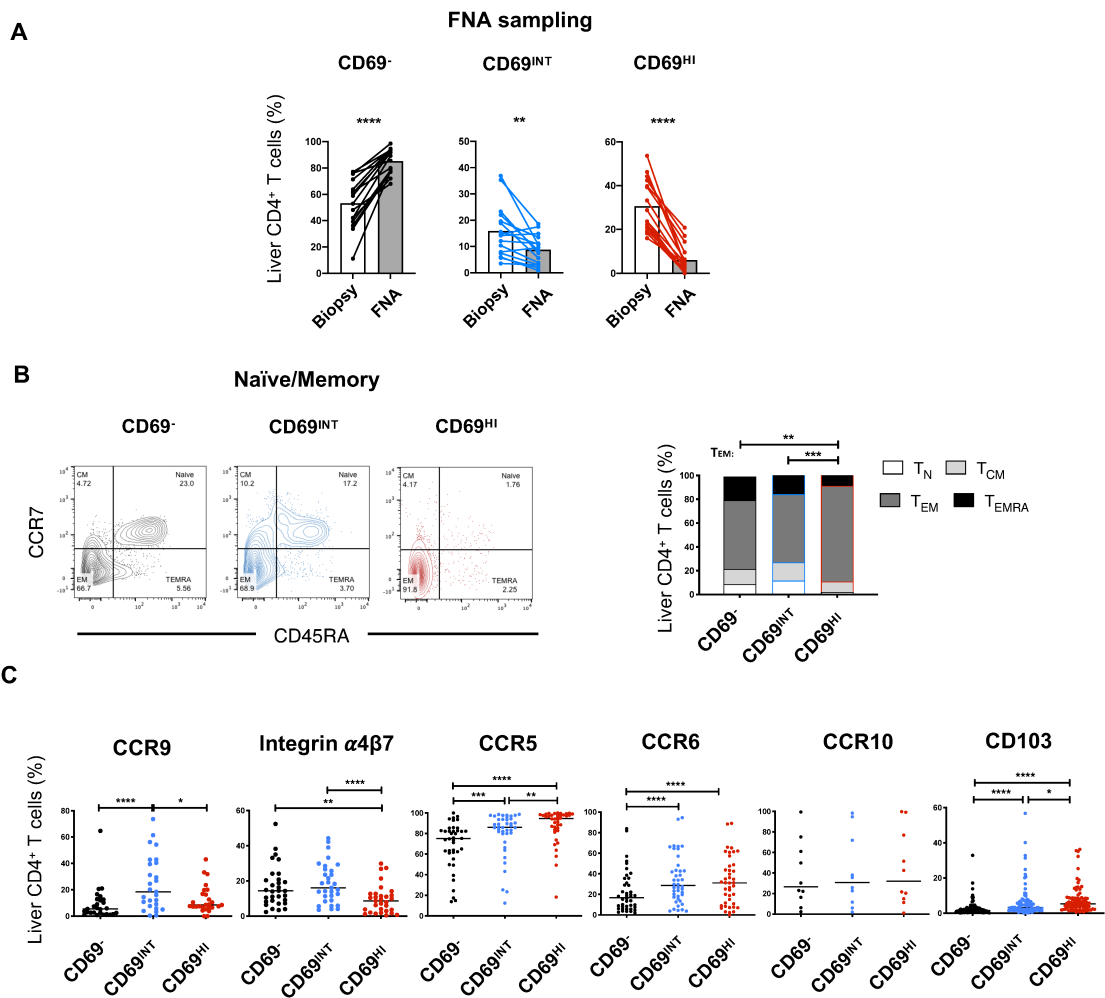

Supplement: gutjnl-2020-323771supp002.pdf [file gutjnl-2020-323771supp002.pdf]
