# Supplementary material for: The human liver microenvironment shapes the homing and function of CD4+ T-cell populations
Source: PubMed Central journal article supplement (PMC9185819; doi:10.1136/gutjnl-2020-323771), 2021-09-21

Supplementary Figure 3 - Localisation of CXCR6- and CX<sub>3</sub>CR1-expressing CD4<sup>+</sup>T-cells throughout the liver

A

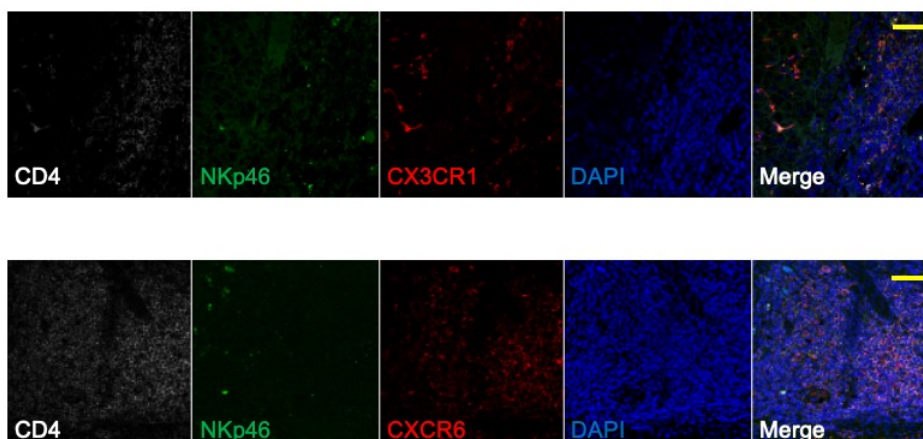

B

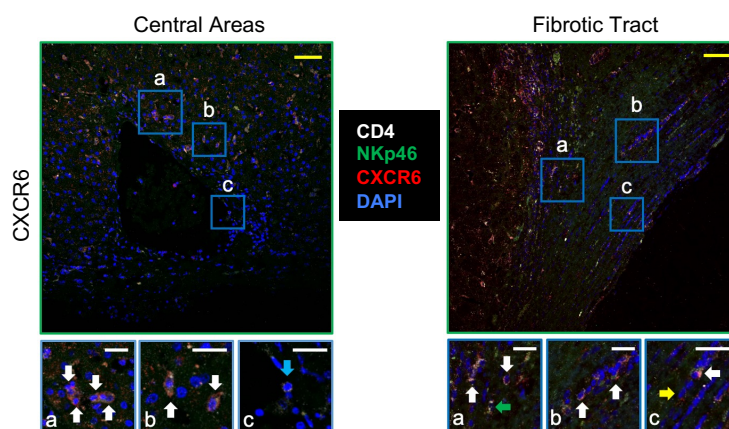

C

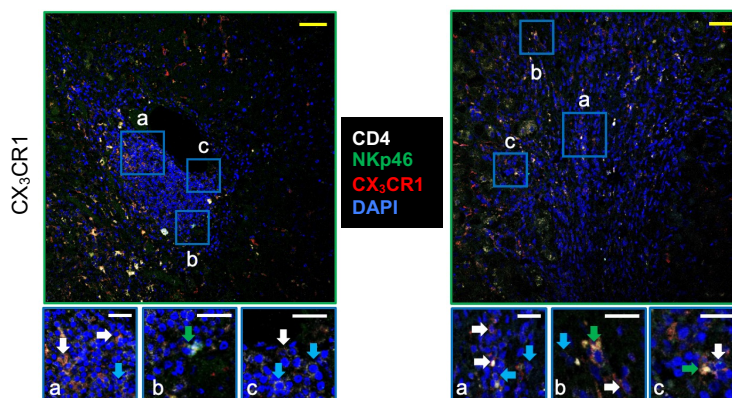

Supplement: gutjnl-2020-323771supp003.pdf [file gutjnl-2020-323771supp003.pdf]
