# Supplementary material for: The human liver microenvironment shapes the homing and function of CD4+ T-cell populations
Source: PubMed Central journal article supplement (PMC9185819; doi:10.1136/gutjnl-2020-323771), 2021-09-21

Supplementary Figure 4 – Conventional regulatory T cells are not enriched in any CD69-designated subset.

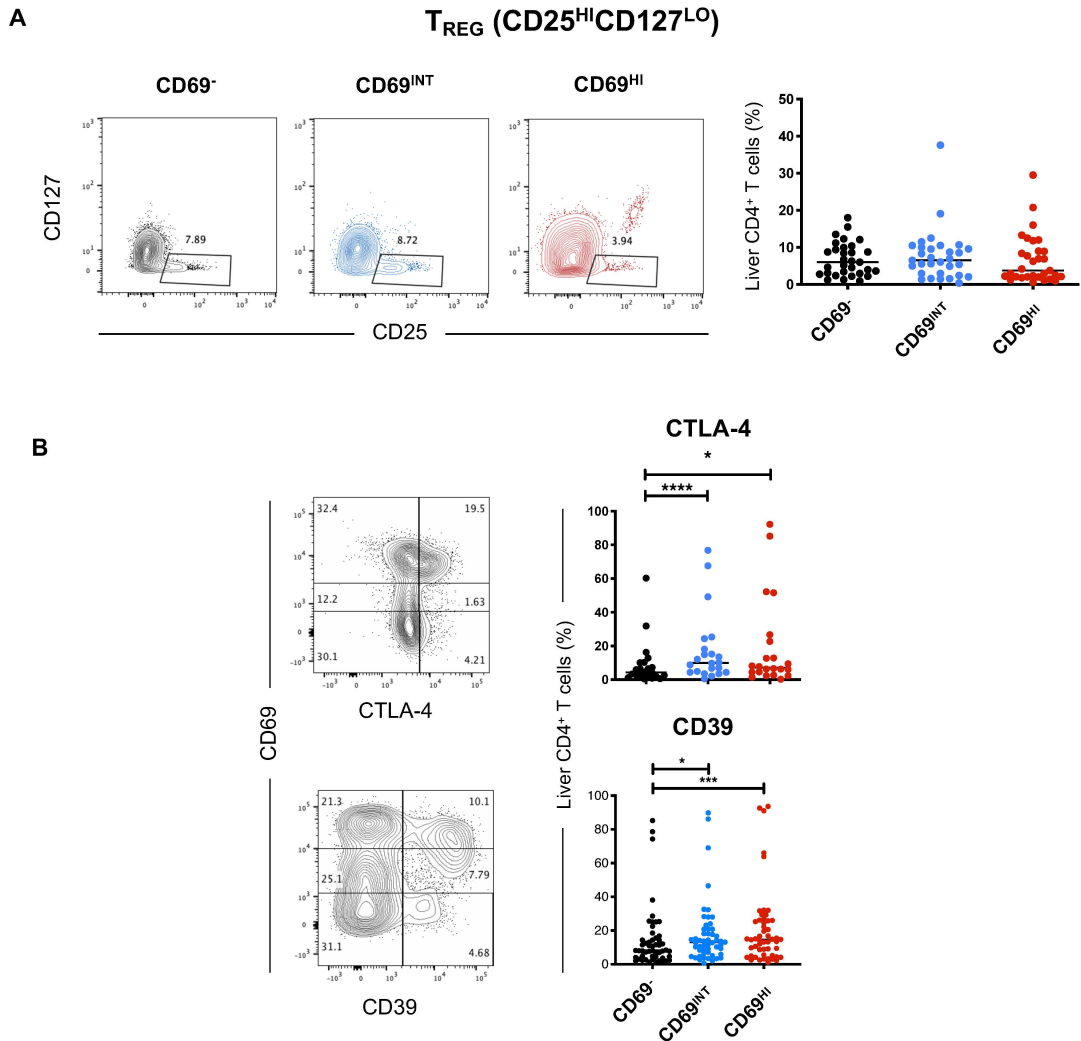

Supplement: gutjnl-2020-323771supp004.pdf [file gutjnl-2020-323771supp004.pdf]
