# Supplementary material for: The human liver microenvironment shapes the homing and function of CD4+ T-cell populations
Source: PubMed Central journal article supplement (PMC9185819; doi:10.1136/gutjnl-2020-323771), 2021-09-21

**Supplementary Figure 5 – Differential cytokine responses of intrahepatic subsets marked by CD69 expression.**

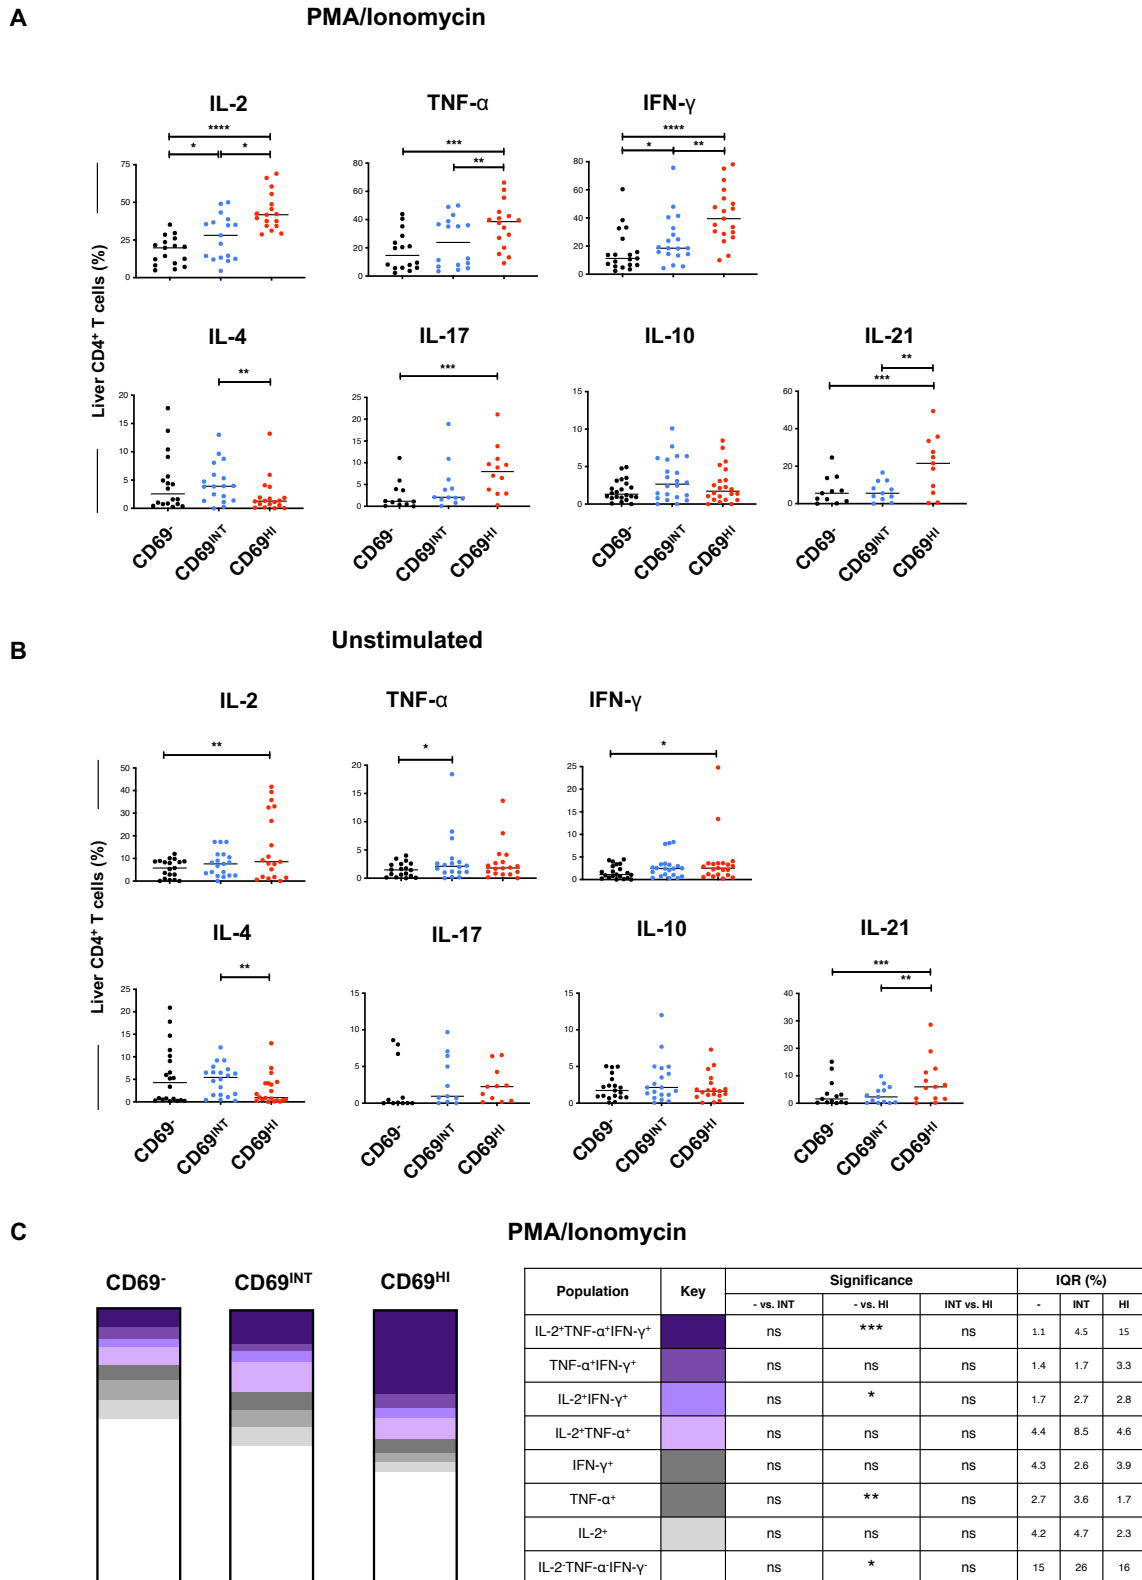

Supplement: gutjnl-2020-323771supp005.pdf [file gutjnl-2020-323771supp005.pdf]
