# Supplementary material for: The human liver microenvironment shapes the homing and function of CD4+ T-cell populations
Source: PubMed Central journal article supplement (PMC9185819; doi:10.1136/gutjnl-2020-323771), 2021-09-21

Supplementary Figure 6 – Transcription Factor profiles of Liver CD4<sup>+</sup> T cell subsets

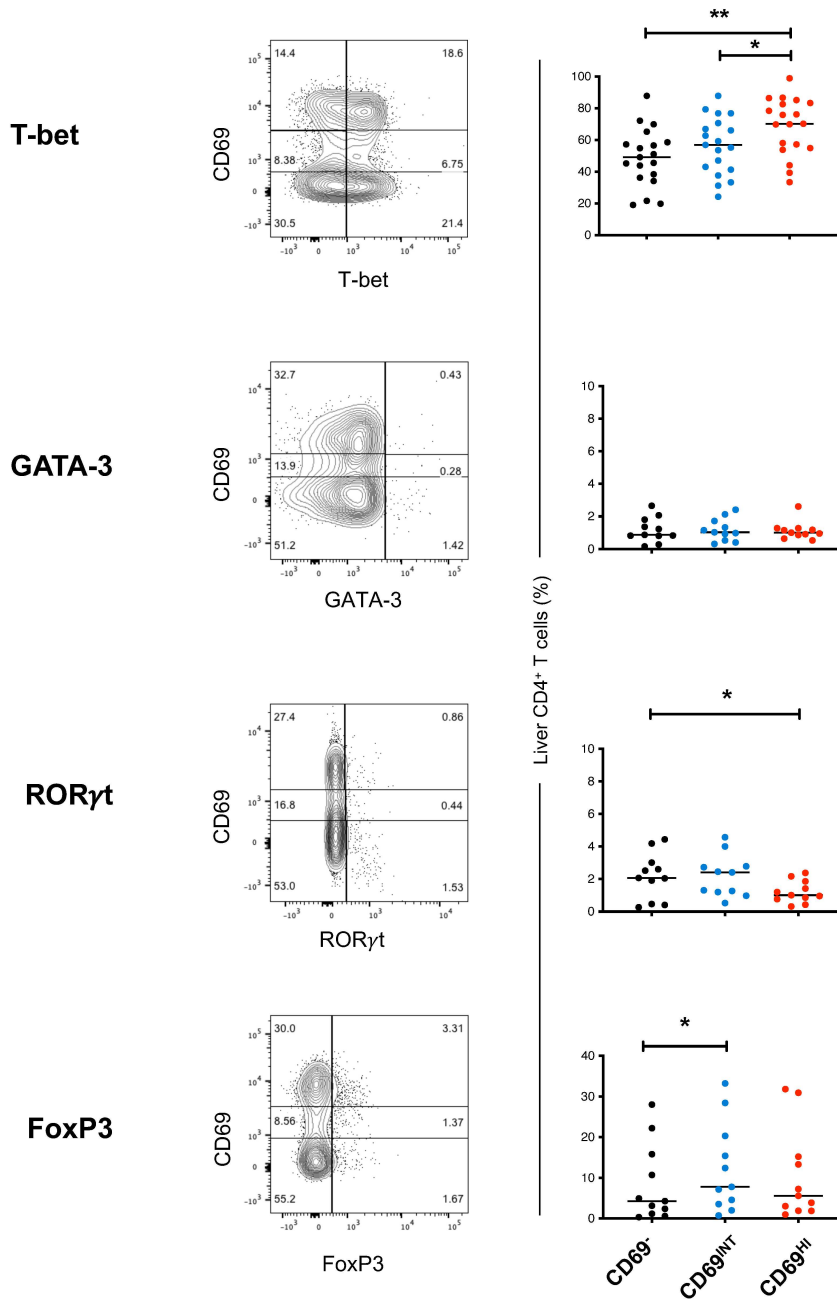

Supplement: gutjnl-2020-323771supp006.pdf [file gutjnl-2020-323771supp006.pdf]
