# Supplementary material for: The human liver microenvironment shapes the homing and function of CD4+ T-cell populations
Source: PubMed Central journal article supplement (PMC9185819; doi:10.1136/gutjnl-2020-323771), 2021-09-21

**Supplementary Figure 8 – CD69<sup>INT</sup> generation occurs with primary human epithelia, is contact-dependent, and more efficient in memory T cells**

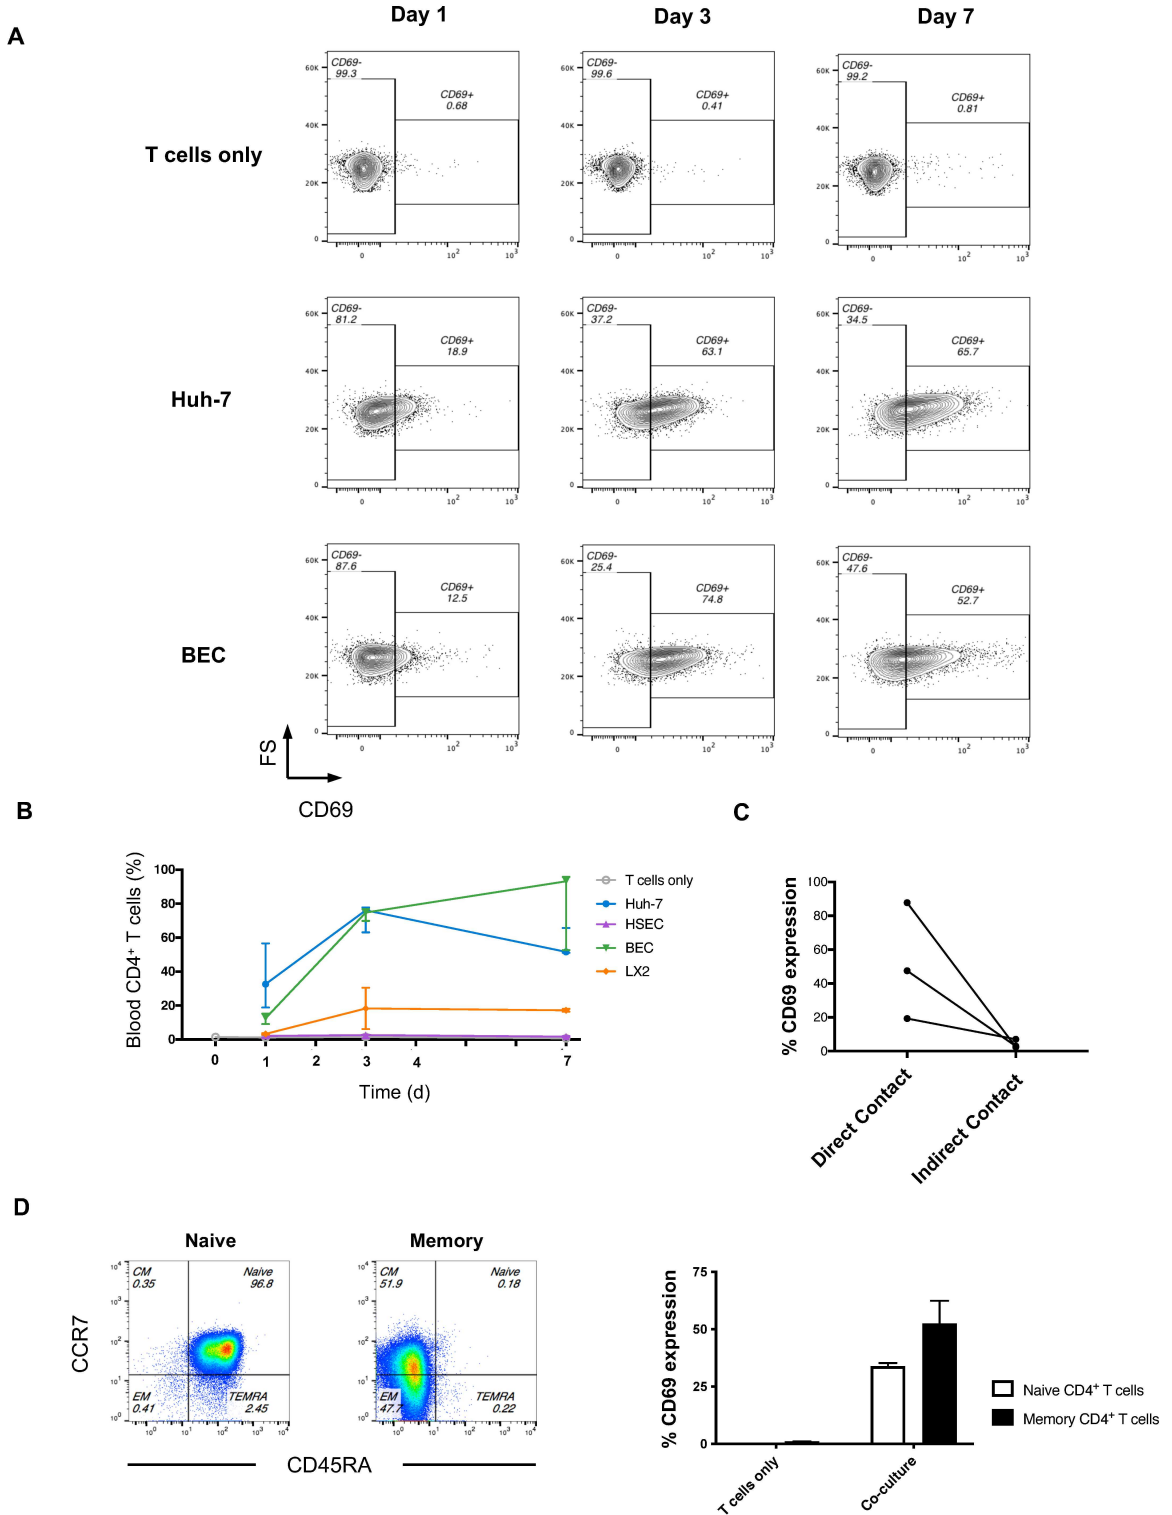

Supplement: gutjnl-2020-323771supp008.pdf [file gutjnl-2020-323771supp008.pdf]
