# Supplementary material for: The human liver microenvironment shapes the homing and function of CD4+ T-cell populations
Source: PubMed Central journal article supplement (PMC9185819; doi:10.1136/gutjnl-2020-323771), 2021-09-21

**Supplementary Figure 9 – Co-culture with hepatic epithelia infers CD4<sup>+</sup> T cells with IL-4 production capacity.**

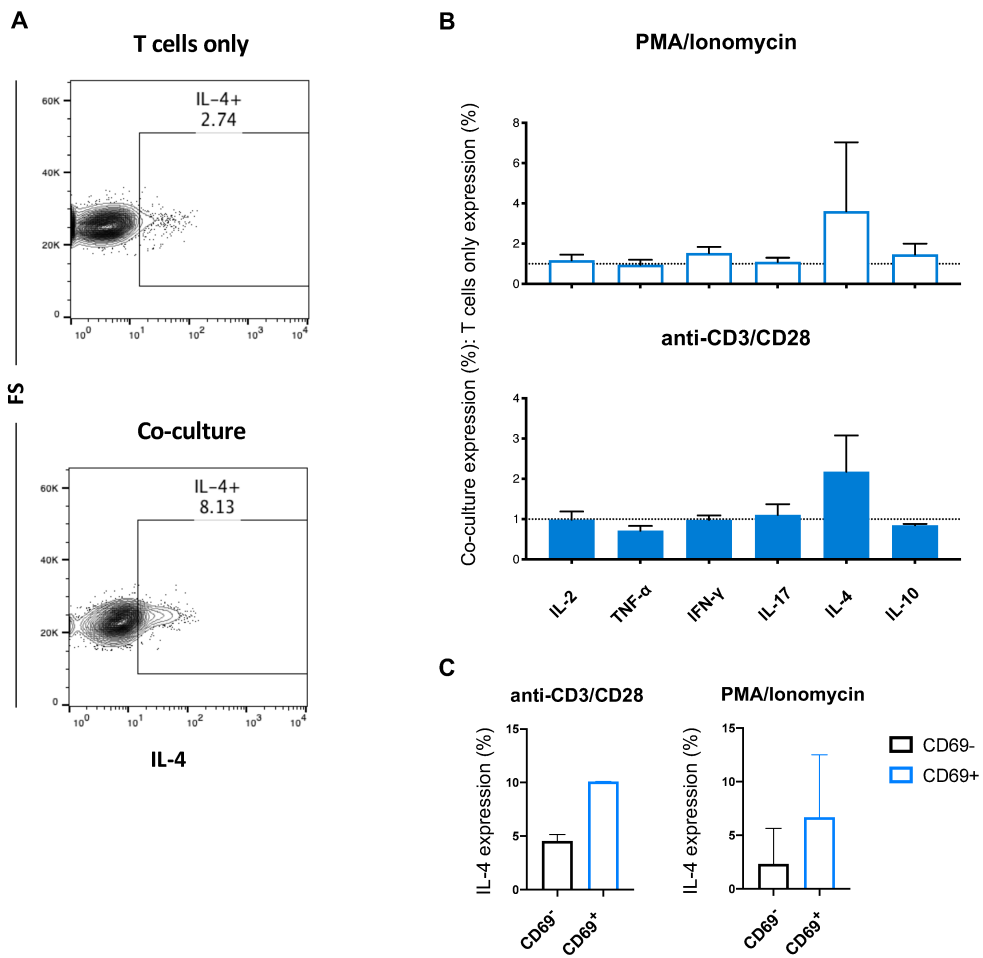

Supplement: gutjnl-2020-323771supp009.pdf [file gutjnl-2020-323771supp009.pdf]
