# Supplementary material for: The human liver microenvironment shapes the homing and function of CD4+ T-cell populations
Source: PubMed Central journal article supplement (PMC9185819; doi:10.1136/gutjnl-2020-323771), 2021-09-21
Supplement: gutjnl-2020-323771supp011.pdf [file gutjnl-2020-323771supp011.pdf]

The liver shapes CD4<sup>+</sup> T cells**Supplementary information:****Supplementary Experimental Procedures****Immune cell isolation**

Peripheral blood mononuclear cells (PBMCs) were isolated from human blood by density centrifugation (Lympholyte-H [Cederlane] – centre A, Ficoll-Hypaque plus [GEHealthcare] – centre B). Intrahepatic lymphocytes (IHL) were isolated through either chopping, multiple PBS washes, digestion with a stomacher machine (Seward), filtering out debris and density centrifugation (centre A); or for centre B biopsies – mechanical disruption with cell scrapers, filtration to remove debris, centrifugation. Larger centre B resections and explants: enzymatic digestion (30min incubation at 37°C with 0.02% Collagenase IV [Thermo-Fisher] 0.002% DNase I [Sigma-Aldrich]), mechanical disruption through a GentleMACS dissociator (Miltenyi Biotec), then 70µm filtering and centrifugation as above. Lymph node and spleen mononuclear cells were isolated through manual dissection, GentleMACS dissociation, filtration, and density centrifugation on Lympholyte-H (centre A); or manual dissection, filtration, and centrifugation on a Pancoll (PanBiotec) gradient. Intraepithelial lymphocytes (IEL) were isolated from the duodenum and ileum of the gut by enzymatic digestion (1hr incubation at 37°C shaking [180rpm] with 0.15% Collagenase IV [Thermo-Fisher] 0.02% DNase I [Sigma-Aldrich] 0.0025% Hyaluronidase Type IV-S [Sigma-Aldrich] 0.00125% Liberase DL [Roche]), mechanical disruption using a syringe, then 70µm filtration and centrifugation on a Pancoll gradient as above. The isolation of IHLs from FNA samples was undertaken as previously described<sup>35</sup>. In brief, samples were centrifuged; the remaining cell pellet was re-suspended in 2mL of red blood cell lysis buffer (Biolegend) for 5min on ice, prior to staining. All samples were used immediately. Any samples for later use were frozen in 10% DMSO (Sigma-Aldrich) in fetal bovine serum (FBS) and stored in accordance with the Human Tissue Act.

**Antibodies for Immunofluorescence**

The following antibodies were used: mouse anti-human CD4 (Novus Biologicals; NBP2-46149), mouse anti-human NKp46 (R&D systems, UK; MAB1850), Rabbit anti-human CX3CR1 (ThermoFisher, UK; 702321) and rabbit-human CXCR6 (Abcam, UK; ab8023). Single stains and IMCs were used to ensure specificity. Secondary antibodies were all purchased from Thermo-Fisher Scientific.

**T cell culture for stimulation experiments**

PBMCs/IHLs were pre-stained with antibodies against CD69, CD4, CD56, and  $\gamma\delta$ -TCR (centre A only), washed twice in PBS, and plated out in 96-well plates at 10<sup>6</sup> cells/well in T-cell media (RPMI [ThermoFisher] + 10% FBS (Sigma-Aldrich), 100U/ml penicillin, 100µg/ml streptomycin, 1% non-essential amino acids (NEAA), 1% L-glutamine [all ThermoFisher Scientific, UK]) containing T cell stimulants.

**T cell co-culture experiments**

Hepatic cell lines all cultured in 24-well plates in 1ml media as follows: Huh-7, HepG2, Hep3B – all in complete DMEM (ThermoFisher): DMEM + 10% FBS, 100U/ml penicillin,

The liver shapes CD4<sup>+</sup> T cells

100µg/ml streptomycin, 1% NEAA, 1% L-glutamine; LX-2 – as above but 2% FBS; primary BEC – 1:1 Ham's F12 media (ThermoFisher) & DMEM + 10% heat activated human serum (HD supplies) 2mM Penicillin/Streptomycin, 10µg/L epidermal growth factor, 10µg/L hepatocyte growth factor (both Peptotech), 124 IU/L Insulin, 20µg/L Hydrocortisone (both QE hospital pharmacy, Birmingham), 10µg/L Cholera Toxin, 0.2nM Tri-iodothyronine (both Sigma-Aldrich); primary HSEC – Human Endothelial Serum free media (ThermoFisher) + 10% heat activated human serum, 10µg/L hepatocyte growth factor, 10µg/L vascular endothelial cell growth factor (Peptotech). BEC and HSEC cultured on type-1 rat-tail collagen (Sigma Aldrich, UK) coated plates (coated with 40µg/ml solution). Once adhered to plate, T cells added to 1ml wells in 100µl of T-cell media.

**Supplementary Figures:**

**Supplementary Figure 1 – Gating strategies used to identify and compare hepatic CD69<sup>-</sup>, CD69<sup>INT</sup> and CD69<sup>HI</sup> cells.** Gating strategy used in centre A (A), and B (B) where blue arrows represent direction of gating (onward gate in bold when multiple in one plot).

**Supplementary Figure 2 – Homing, location, and naïve/memory profiles of CD69-delimited subsets.** A – Comparison of each subset (%) recovered from liver tissue digests or fine needle aspirate (FNA) samples. B – proportion of liver CD4<sup>+</sup> T cells in each subset that comprise naïve, central memory (T<sub>CM</sub>), effector memory (T<sub>EM</sub>), or T<sub>EMRA</sub> as shown in representative plots and combined stack chart (n=51). C – Expression of additional homing/retention molecules in each subset. D – Immunofluorescent staining of formaldehyde-fixed paraffin-embedded liver sections (from patient with PBC). White arrows indicate CX<sub>3</sub>CR1<sup>+</sup> CD4<sup>+</sup> T cells. Statistical comparisons by Wilcoxon matched-pairs signed rank tests (part A); Freidman tests with Dunn's multiple tests for parts B-C.

**Supplementary Figure 3 - Localisation of CXCR6- and CX<sub>3</sub>CR1-expressing CD4<sup>+</sup>T-cells throughout the liver.** A – Example stains for each chemokine receptor merged and split by channel. B – Presence of cells of interest in central areas (D), and fibrotic areas (E). Central areas n=14 (5 donor, 4 HBV, 5 PBC), fibrotic areas n=9 (4 HBV, 5 PBC). Areas of interest a-c show higher magnification of cells of interest (white arrows – cell of interest, green arrows – NKp46<sup>+</sup> cell, yellow arrow – chemokine receptor<sup>+</sup> CD4<sup>+</sup> cell. Yellow scale bars - 50µm, white scale bars – 20µm.

**Supplementary Figure 4 – Conventional regulatory T cells are not enriched in any CD69-designated subset.** A – Representative gating for T<sub>REGS</sub> (CD25<sup>HI</sup>CD127<sup>LO</sup>) in each subset. Violin plot shows combined expression data. B – Expression of T<sub>REG</sub> cardinal features in each subset – CTLA-4 and CD39 by representative staining and combined total data. Freidman tests with Dunn's multiple tests used for statistical comparison throughout.

**Supplementary Figure 5 – Differential cytokine responses of intrahepatic subsets marked by CD69 expression.** A – Cytokine expression following 5-hour stimulation of IHL with PMA and Ionomycin, followed by intracellular staining. IL-2 (n=17), TNF-α (n=16), IFN-γ (n=19), IL-4 (n=18), IL-17 (n=12), IL-10 (n=17), IL-21 (n=11). B – Expression of cytokines following 5hr in absence of stimulation, followed by intracellular staining. IL-2 (n=19), TNF-α (n=18), IFN-γ (n=21), IL-4 (n=20), IL-17 (n=11), IL-10 (n=19), IL-21 (n=13). C - Multi-functional responses of liver CD69<sup>-</sup>, CD69<sup>INT</sup>, and CD69<sup>HI</sup> CD4<sup>+</sup> T cells following 5-hour PMA/Ionomycin stimulation. Stacked bar chart heights represent median % of each combination of IL-2/TNF-α/IFN-γ-expressing cells as shown (n=7). Table displays statistical significance between the

The liver shapes CD4<sup>+</sup> T cells

three populations, and interquartile range values. Freidman tests with Dunn's multiple tests used to compare matched populations throughout.

**Supplementary Figure 6 – Transcription Factor profiles of Liver CD4<sup>+</sup> T cell subsets.** Representative plots and combined % expression of T-bet (n=19), GATA-3, Ror $\gamma$ t and FoxP3 (all n=11) amongst CD69-designated subsets. Freidman tests with Dunn's multiple tests used for statistical comparisons.

**Supplementary Figure 7 – Additional correlation analysis with clinical parameters in HBV patient livers.** **A** – Frequency of each subset in Hepatitis B e antigen positive vs – negative patients (Mann Whitney Test). **B** – Correlation of patient serum ALT against frequency of each subset. Spearman's correlation analysis p and r values given. **C** – Frequency of each subset in chronic HBV patient donor livers at each HBV disease stage. Disease staging of HBV donors determined by combination of HBeAg, HBV DNA, and serum ALT (compared by Kruskal-Wallis tests with multiple Dunn's post-hoc testing). Only 1 donor was at immunotolerant stage, so this stage excluded from dataset shown.

**Supplementary Figure 8 – CD69<sup>INT</sup> generation occurs with primary human epithelia and is contact-dependent.** CD69 expression in peripheral blood-derived CD4<sup>+</sup> T cells following co-culture for 1,3, and 7 days alone, with Huh-7 cells, or BEC. Data displayed as representative flow cytometry plots (**A**), and combined donor data alongside HSEC and LX-2 culture conditions (**B**). Median + 95% CI shown (n=3). **C** – CD69% expression amongst PBMC-derived CD4<sup>+</sup> T cells when either cultured overnight with Huh-7 cells directly (direct contact), or when separated by a 0.4 $\mu$ m pore transwell insert (indirect contact). **D** – Naïve/Memory CD4<sup>+</sup> T cell purity following isolation, followed by % CD69 expression following 16h co-culture with Huh-7 cells (n=1, 2 technical replicates).

**Supplementary Figure 9 – Co-culture with hepatic epithelia infers CD4<sup>+</sup> T cells with IL-4 production capacity.** CD4<sup>+</sup> T cells isolated from healthy human blood were cultured for 5 hours either alone or with Huh-7 hepatic epithelial cells, harvested and stimulated for 4 hours with anti-CD3/CD28 or PMA/Ionomycin, and then assessed for their ability to produce prototypic T cell cytokines by intracellular staining and flow cytometry. **A** – Staining example for IL-4 in T cells alone and following co-culture (PMA/Ionomycin stimulation). **B** – % expression of all the cytokines studied in co-cultured cells as a fold change from control (T cell only) cells (anti-CD3/CD28 – top, PMA/Ionomycin stimulation – bottom). **C** – Percentage expression of IL-4 in co-cultured CD69<sup>+</sup> versus co-cultured CD69<sup>-</sup> cells (both stimulation methods shown). Data from this experiment compiled from three independent donors.

The liver shapes CD4<sup>+</sup> T cells

## Supplementary Tables:

## Supplementary Table 1 – Patient information for Liver tissue donors.

Shown are the disease breakdowns, sample type acquired and donor numbers in each group, together with median and IQR of the ages, and gender in each group. Numbers of donors acquired from each centre (A – University of Birmingham, B – University College London). AIH – Autoimmune hepatitis, ALD – Alcoholic liver disease, ARLD – Alcohol-related liver disease, BCM – breast cancer metastasis, CRC – colorectal cancer, HBV – hepatitis B virus, HCC – hepatocellular carcinoma, HCV – hepatitis C virus, MM – melanoma metastasis, NASH – non-alcoholic steatohepatitis, PBC – Primary biliary cholangitis, PSC – primary sclerosing cholangitis, NCPH – non-cirrhotic portal hypertension, SBC – secondary biliary cholangitis. \* - 2 patient ages missing, \*\* - 3 patient ages missing, \*\*\* - 6 patient ages missing, † - 2 patient genders missing, †† - 4 patient genders missing, ††† - 6 patient genders missing from available data.

| Aetiology   | Sample Type              | Numbers | Median age (IQR) | % Female          | Centre A/B |
|-------------|--------------------------|---------|------------------|-------------------|------------|
| Control     | Donor Explant            | 12      | 51 (22)*         | 25 <sup>††</sup>  | A(8) B(4)  |
| Control     | Pre-implant donor biopsy | 7       | 39* (14)         | 33 <sup>††</sup>  | B          |
| Control     | CRC margin               | 45      | 61 (18)***       | 20 <sup>††</sup>  | B          |
| Control     | HCC margin               | 11      | 62.5 (8.8)**     | 25 <sup>†</sup>   | B          |
| Control     | BCM margin               | 1       | 57               | 100               | B          |
| Control     | MM margin                | 1       | 83               | 0                 | B          |
| Control     | PLD                      | 3       | 61 (7)           | 100               | A          |
| HBV         | Explant                  | 4       | 39 (3)*          | 50 <sup>†</sup>   | A(1) B(3)  |
| HBV         | Biopsy                   | 51      | 35 (17.25)       | 29 <sup>†††</sup> | B          |
| ALD         | Explant                  | 20      | 59 (14.3)        | 15                | A          |
| ARLD        | Explant                  | 1       | 48               | 0                 | B          |
| NASH        | Explant                  | 8       | 60.5 (9.3)       | 50                | A          |
| NASH        | Explant                  | 1       | 51               | 0                 | B          |
| PBC         | Explant                  | 7       | 44 (11.5)        | 71                | A          |
| PSC         | Explant                  | 12      | 35.5 (12.3)      | 25                | A          |
| AIH         | Explant                  | 1       | 21               | 0                 | A          |
| HCV         | Explant                  | 2       | 59 (6)           | 0                 | A          |
| HCV         | Explant                  | 3       | 61 (9)           | 33                | B          |
| Cryptogenic | Explant                  | 2       | 53.5 (10.5)      | 50                | A          |
| Budd Chiari | Explant                  | 1       | 31               | 0                 | A          |
| NCPH        | Explant                  | 1       | 63               | 0                 | A          |
| SBC         | Explant                  | 1       | 58               | 100               | A          |

The liver shapes CD4<sup>+</sup> T cells

Supplementary Table 2 – Patient information for lymph node, gut and spleen donors

| Aetiology | Sample Type                 | Numbers | % Female  | Centre A/B |
|-----------|-----------------------------|---------|-----------|------------|
| Donor     | Hepatic hilar LN            | 6       | A(4) B(2) |            |
| Donor     | Non-hepatic LN (mesenteric) | 6       | B         |            |
| Donor     | Biopsy – Duodenum           | 4       | B         |            |
| Donor     | Biopsy – Ileum              | 2       | B         |            |
| Donor     | Spleen                      | 4       | A(1) B(2) |            |

Supplementary Table 3 – Antibodies used in flow cytometry experiments

| Antigen          | Fluorochrome  | Manufacturer   | Clone     | Catalogue Number |
|------------------|---------------|----------------|-----------|------------------|
| <b>Phenotype</b> |               |                |           |                  |
| CCR10            | PE            | Biolegend      | 6588-5    | 341504           |
| CCR5             | PE            | Biolegend      | J418F1    | 359106           |
| CCR6             | AlexaFluor488 | Biolegend      | G034E3    | 353414           |
| CCR7             | PE-Cy7        | Biolegend      | G043H7    | 353226           |
| CCR9             | PerCP-Cy5.5   | Biolegend      | L053E8    | 358906           |
| CD103            | APC           | BD Biosciences | Ber-ACT8  | 563883           |
| CD103            | BV605         | Biolegend      | Ber-ACT8  | 350218           |
| CD103            | FITC          | Biolegend      | Ber-ACT8  | 350203           |
| CD127            | BV510         | Biolegend      | A019D5    | 351332           |
| CD25             | PE-Cy5        | Biolegend      | BC96      | 302608           |
| CD27             | FITC          | Biolegend      | M-T271    | 356404           |
| CD3              | BV711         | Biolegend      | OKT3      | 317328           |
| CD3              | BV711         | BD Biosciences | UCHT1     | 563546           |
| CD38             | APC-Vio770    | Mltenyi Biotec | REA572    | 130-099-151      |
| CD39             | BV421         | Biolegend      | A1        | 328214           |
| CD4              | APC           | BD Biosciences | RPA-T4    | 555349           |
| CD4              | BV510         | Biolegend      | SK3       | 344634           |
| CD4              | FITC          | Biolegend      | OKT4      | 317408           |
| CD4              | APC-Cy7       | BD Biosciences | RPA-T4    | 557871           |
| CD4              | BV421         | BD Biosciences | RPA-T4    | 562425           |
| CD45             | BUV805        | BD Biosciences | HI30      | 564914           |
| CD45RA           | BV421         | BD Biosciences | HI100     | 562885           |
| CD45RA           | PE-Cy7        | Biolegend      | HI100     | 3014126          |
| CD45RA           | eFluor450     | Thermo Fisher  | HI100     | 48-0458-41       |
| CD49a            | PE            | Biolegend      | TS2/7     | 328304           |
| CD49d            | BV421         | Biolegend      | 9F10      | 304322           |
| CD56             | APC-Vio770    | Mltenyi Biotec | REA196    | 130-100-690      |
| CD56             | BUV395        | BD Biosciences | NCAM16.2  | 563555           |
| CD69             | FITC          | BD Biosciences | FN50      | 560969           |
| CD69             | PE-Dazzle594  | Biolegend      | FN50      | 310942           |
| CD69             | BV605         | Biolegend      | FN50      | 310937           |
| CD8              | BV786         | Biolegend      | RPA-T8    | 301046           |
| CD8              | PE-Cy5        | Biolegend      | RPA-T8    | 301010           |
| CD8              | AlexaFluor700 | Biolegend      | RPA-T8    | 300518           |
| CD8              | AlexaFluor700 | Thermo Fisher  | OKT8      | 56-0086-82       |
| CTLA-4           | PE-Dazzle594  | Biolegend      | L3D10     | 349922           |
| CX3CR1           | PE-Cy7        | Biolegend      | 2A9-1     | 341612           |
| CXCR1            | PE-Cy7        | Biolegend      | 8F1/CXCR1 | 320620           |
| CXCR3            | AlexaFluor488 | Biolegend      | G025H7    | 353710           |
| CXCR6            | APC           | Biolegend      | K041E5    | 356005           |
| CXCR6            | PerCP-Cy5.5   | Biolegend      | K041E5    | 356010           |

The liver shapes CD4<sup>+</sup> T cells

| FOXP3                  | PE              | Thermo-Fisher     | PCH101    | 12-4776-42       |
|------------------------|-----------------|-------------------|-----------|------------------|
| FoxP3                  | BV421           | Biolegend         | 206D      | 320124           |
| GATA-3                 | BV421           | Biolegend         | 16E10A23  | 653813           |
| Antigen                | Fluorochrome    | Manufacturer      | Clone     | Catalogue Number |
| GATA-3                 | BB700           | BD Biosciences    | L50-823   | 566643           |
| HLA-DR                 | FITC            | BD Biosciences    | G46-6     | 555811           |
| HLA-DR                 | BV421           | Biolegend         | L243      | 307636           |
| HLA-DR                 | Horizon V500    | BD Biosciences    | G46-6     | 561224           |
| Integrin $\beta$ 7     | PE              | Biolegend         | FIB504    | 321204           |
| KLRG-1                 | PE              | Biolegend         | SA231A2   | 367712           |
| PD-1                   | PE              | Biolegend         | EH12.2H7  | 329906           |
| ROR $\gamma$ t         | BV650           | BD Biosciences    | Q21-559   | 563424           |
| ROR $\gamma$ t         | FITC            | BD Biosciences    | Q21-559   | 563621           |
| S1PR1                  | eFluor660       | Thermo Fisher     | SW4GYPP   | 50-3639-41       |
| T-bet                  | APC             | Thermo-Fisher     | eBio4B10  | 50-5825-82       |
| $\gamma\delta$ -TCR    | APC-Vio770      | Miltenyi Biotec   | 11F2      | 130-109-360      |
| <b>Function</b>        |                 |                   |           |                  |
| IFN- $\gamma$          | APC             | BD Biosciences    | B27       | 554702           |
| IFN- $\gamma$          | AlexaFluor700   | Biolegend         | B27       | 506516           |
| IFN- $\gamma$          | Horizon V450    | BD Biosciences    | B27       | 560371           |
| IL-10                  | BV421           | Biolegend         | JES3-9D7  | 501421           |
| IL-10                  | FITC            | Biolegend         | JES3-9D7  | 501411           |
| IL-10                  | PE              | Biolegend         | JES3-9D7  | 501404           |
| IL-17A                 | PerCP-Cy5.5     | Biolegend         | BL168     | 512313           |
| IL-17A                 | BUV605          | Biolegend         | BL168     | 512325           |
| IL-2                   | PE              | Thermo Fisher     | MQ1-17H12 | 12-7029-82       |
| IL-2                   | PerCP-eFluor710 | Thermo Fisher     | MQ1-17H12 | 46-70290-42      |
| IL-2                   | BB700           | BD Biosciences    | MQ1-17H12 | 566406           |
| IL-21                  | PE              | Biolegend         | 3A3-N2    | 513004           |
| IL-21                  | PE              | BD Biosciences    | 3A3-N2.1  | 562042           |
| IL-4                   | PE-Cy7          | Biolegend         | MP4-25D2  | 500824           |
| IL-4                   | AlexaFluor647   | Biolegend         | MPA-25D2  | 500818           |
| Ki-67                  | PB              | Biolegend         | Ki-67     | 350512           |
| TGF- $\beta$           | APC             | Novus Biologicals | 1D11      | IC420A           |
| TNF- $\alpha$          | eFluor450       | Thermo Fisher     | MAb11     | 48-7349-42       |
| TNF- $\alpha$          | FITC            | BD Biosciences    | MAb11     | 554512           |
| TNF- $\alpha$          | PE-Cy7          | Biolegend         | Mb11      | 502930           |
| <b>HLA-haplotyping</b> |                 |                   |           |                  |
| HLA-A2                 | FITC            | BioRad            | BB7.2     | MCA2090          |
| HLA-A2                 | PE-Cy7          | Biolegend         | BB7.2     | 343302           |
| HLA-A3                 | PE              | Thermo Fisher     | GAP.A3    | 11-5754-42       |
| HLA-A9                 | APC             | Miltenyi Biotec   | Rea127    | 130-099-540      |

The liver shapes CD4<sup>+</sup> T cells

Supplementary Table 4 – Disease aetiology for functional experiments

| Figure | Cytokine                          | Condition     | n= | Breakdown                                                                                                |
|--------|-----------------------------------|---------------|----|----------------------------------------------------------------------------------------------------------|
| 4A     | IL-2                              | Anti-CD3/CD28 | 27 | 2 PBC, 5 control donor, 12 CRC, 1 ARLD, 1 BCM, 1 PSC, 1 ALD, 1 NASH, 1 PLD, 1 Cryptogenic, 1 Budd Chiari |
| 4B     | TNF- $\alpha$                     | Anti-CD3/CD28 | 24 | 2 PBC, 5 control donor, 11 CRC, 1 PSC, 1 ALD, 1 NASH, 1 PLD 1 Cryptogenic, 1 Budd Chiari                 |
| 4C     | IFN- $\gamma$                     | Anti-CD3/CD28 | 24 | 2 PBC, 5 control donor, 11 CRC, 1 PSC, 1 ALD, 1 NASH, 1 PLD 1 Cryptogenic, 1 Budd Chiari                 |
| 4D     | IL-4                              | Anti-CD3/CD28 | 18 | 2 PBC, 9 CRC, 1 PSC, 1 ALD, 1 ARLD, 1 BCM, 1 NASH, 1 PLD, 1 Budd Chiari                                  |
| 4E     | IL-17                             | Anti-CD3/CD28 | 16 | 2 PBC, 5 control donor, 3 CRC, 1 BCM, 1 ARLD, 1 PLD, 1 cryptogenic, 1 NASH, 1 Budd Chiari                |
| 4F     | IL-10                             | Anti-CD3/CD28 | 22 | 2 PBC, 1 NASH, 1 PLD, 1 Budd Chiari, 1 PSC, 5 control donor, 9 CRC, 1 BCM, 1 ARLD                        |
| 4G     | IL-21                             | Anti-CD3/28   | 11 | 9 CRC, 1 ARLD, 1 BCM                                                                                     |
| S5A    | IL-2                              | PMA/Ionomycin | 17 | 2 PBC, 1 PSC, 1 ALD, 1 ARLD, 7 CRC, 1 BCM, 1 NASH, 1 PLD 1 Cryptogenic, 1 Budd Chiari                    |
| S5A    | TNF- $\alpha$                     | PMA/Ionomycin | 16 | 2 PBC, 2 control donor, 6 CRC, 1 PSC, 1 ALD, 1 NASH, 1 PLD 1 Cryptogenic, 1 Budd Chiari                  |
| S5A    | IFN- $\gamma$                     | PMA/Ionomycin | 19 | 2 PBC, 2 control donor, 1 PSC, 1 ALD, 1 NASH, 1 PLD 1 Cryptogenic, 1 Budd Chiari, 1 ARLD, 7 CRC, 1 BCM   |
| S5A    | IL-4                              | PMA/Ionomycin | 18 | 2 PBC, 2 control donor, 1 PSC, 1 ALD, 1 NASH, 1 PLD 1 Cryptogenic, 1 Budd Chiari, 1 ARLD, 7 CRC, 1 BCM   |
| S5A    | IL-17                             | PMA/Ionomycin | 12 | 2 PBC, 2 control donor, 1 ALD, 1 NASH, 1 PLD 1 Cryptogenic, 1 Budd Chiari, 1 ARLD, 1 CRC, 1 BCM          |
| S5A    | IL-10                             | PMA/Ionomycin | 17 | 2 PBC, 2 control donor, 1 PSC, 1 NASH, 1 PLD, 1 Budd Chiari, 1 ARLD, 7 CRC, 1 BCM                        |
| S5A    | IL-21                             | PMA/Ionomycin | 11 | 2 control donors, 7 CRC, 1 ARLD, 1 BCM                                                                   |
| S5B    | IL-2                              | Unstimulated  | 19 | 2 PBC, 1 PSC, 1 ALD, 1 ARLD, 9 CRC, 1 BCM, 1 NASH, 1 PLD 1 Cryptogenic, 1 Budd Chiari                    |
| S5B    | TNF- $\alpha$                     | Unstimulated  | 18 | 2 PBC, 2 control donor, 1 PSC, 1 ALD, 9 CRC, 1 NASH, 1 PLD 1 Cryptogenic, 1 Budd Chiari                  |
| S5B    | IFN- $\gamma$                     | Unstimulated  | 21 | 2 PBC, 2 control donor, 1 PSC, 1 ALD, 1 ARLD, 9 CRC, 1 BCM, 1 NASH, 1 PLD 1 Cryptogenic, 1 Budd Chiari   |
| S5B    | IL-4                              | Unstimulated  | 20 | 2 PBC, 2 control donor, 1 PSC, 1 ALD, 1 ARLD, 9 CRC, 1 BCM, 1 NASH, 1 PLD, 1 Budd Chiari                 |
| S5B    | IL-17                             | Unstimulated  | 11 | 2 PBC, 8 CRC, 2 control donor, 1 ALD, 1 NASH, 1 PLD, 1 Budd Chiari, 1 cryptogenic,                       |
| S5B    | IL-10                             | Unstimulated  | 19 | 2 PBC, 2 control donor, 1 PSC, 1 ARLD, 9 CRC, 1 BCM, 1 NASH, 1 PLD, 1 Budd Chiari                        |
| S5B    | IL-21                             | Unstimulated  | 13 | 2 control donors, 9 CRC, 1 ARLD, 1 BCM                                                                   |
| S5C    | IL-2/TNF- $\alpha$ /IFN- $\gamma$ | PMA/Ionomycin | 7  | 2 PBC, 1 PSC, 1 ALD, 1 NASH, 1 PLD, 1 Budd Chiari                                                        |
